# Supplementary material for: Remote Sensing Estimation of CDOM and DOC with the Environmental Implications for Lake Khanka
Source: MDPI journal article supplement (doi:10.3390/rs15245707), 2023-12-13
Supplement: s1 [file s1]

## Article

# Remote Sensing Estimation of CDOM and DOC with the Environmental Implications for Lake Khanka

Sining Qiang <sup>1,2</sup>, Kaishan Song <sup>2</sup>, Yingxin Shang <sup>2</sup>, Fengfa Lai <sup>2</sup>, Zhidan Wen <sup>2</sup>, Ge Liu <sup>2</sup>, Hui Tao <sup>2</sup> and Yunfeng Lyu <sup>1,\*</sup>

<sup>1</sup> School of Geographic Science, Changchun Normal University, Changchun 130102, China; qiangsining@iga.ac.cn

<sup>2</sup> Northeast Institute of Geography and Agroecology, Chinese Academy of Sciences, Changchun 130102, China; songkaishan@iga.ac.cn (K.S.); shangyingxin@iga.ac.cn (Y.S.); laifengfa@iga.ac.cn (F.L.); wenzhidan@iga.ac.cn (Z.W.); liuge@iga.ac.cn (G.L.); taohui@iga.ac.cn (H.T.)

\* Correspondence: lvyunfeng@ccsfu.edu.cn

## Other datasets:

The dataset of natural meteorological factors such as temperature, precipitation, wind speed, and atmospheric pressure we obtained comes from <https://www.ncei.noaa.gov/maps/daily/> in jixi Meteorological Station.

NDVI comes from MODIS/Terra Vegetation Indices Monthly L3 Global1km SIN Grid V061. The water volume data of Lake Khanka comes from <https://hydroweb.theia-land.fr/>. The population data of China and Russia comes from the WorldPop dataset in GEE, and the socio-economic data comes from <https://d.qianzhan.com/>.

The Modified Normalized Differential Water Index (MNDWI) is computed and adjusted using a specific formula. This calculation is performed after the OLCI image data has been preprocessed and cloud-free images have been selected from the non-glacial period (May to October). The extraction of these images is achieved by constructing a decision tree using ENVI5.3.

$$\text{MNDWI} = (\text{GREEN} - \text{SWIR}) / (\text{GREEN} + \text{SWIR}) \quad (\text{S1})$$

In Eq. (S1), the term "GREEN" refers to the green band, while "SWIR" represents the short-wave near-infrared band. Based on previous knowledge, the MNDWI threshold is established at 0.3. Subsequently, the decision tree is employed to exclude the portion with an NDWI value below 0.3. As a result, the water extents for the years 2016–2022 are derived using this methodology.

Table S1. Sentinel-3 Ocean and Land Color Instrument (S3-OLCI) spectral and spatial specifications.

| Band Number | Central length(nm) | Wave- | Bandwidth(nm) |
|-------------|--------------------|-------|---------------|
| Oa1         | 400                |       | 15            |
| Oa2         | 412.5              |       | 10            |
| Oa3         | 442.5              |       | 10            |
| Oa4         | 490                |       | 10            |
| Oa5         | 510                |       | 10            |
| Oa6         | 560                |       | 10            |
| Oa7         | 620                |       | 10            |
| Oa8         | 665                |       | 10            |
| Oa9         | 673.75             |       | 7.5           |
| Oa10        | 681.25             |       | 7.5           |
| Oa11        | 708.75             |       | 10            |
| Oa12        | 753.75             |       | 7.5           |
| Oa13        | 761.25             |       | 2.5           |
| Oa14        | 764.375            |       | 3.75          |
| Oa15        | 767.5              |       | 2.5           |
| Oa16        | 778.75             |       | 15            |
| Oa17        | 865                |       | 20            |

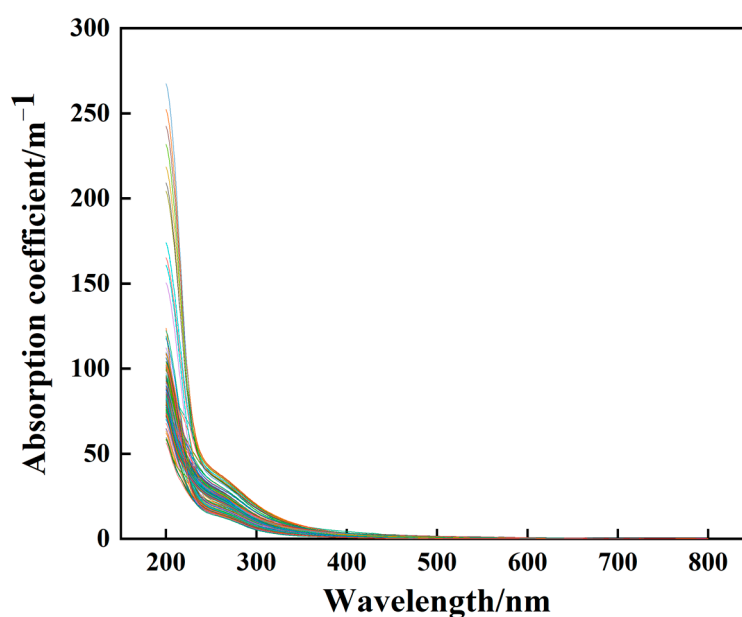

Fig S1. CDOM absorption coefficient curve of samples from 200 to 800 nm

Table S2. Descriptive statistics of water quality parameters

| Parameters of Water Quality | Number | Mean        | Maximum | Minimum |
|-----------------------------|--------|-------------|---------|---------|
| a(350)                      | 159    | 4.08±1.44   | 7.99    | 1.52    |
| DOC                         | 159    | 5.11±1.41   | 9.04    | 1.30    |
| COD <sub>Mn</sub>           | 62     | 20.87±27.45 | 78.00   | 1.07    |
| TN                          | 157    | 0.46±0.29   | 1.37    | 0.04    |
| TP                          | 157    | 0.24±0.19   | 0.76    | 0.01    |
| SDD                         | 97     | 21.50±5.89  | 37.00   | 10.00   |

|          |     |              |        |       |
|----------|-----|--------------|--------|-------|
| Chla     | 159 | 10.32±9.33   | 61.25  | 1.46  |
| Ph       | 43  | 8.20±0.18    | 8.46   | 7.92  |
| Turb     | 126 | 105.95±67.53 | 439.60 | 32.78 |
| Salinity | 108 | 2.52±5.46    | 29.75  | 0.07  |
| TSM      | 139 | 86.91±46.91  | 297.50 | 25.00 |

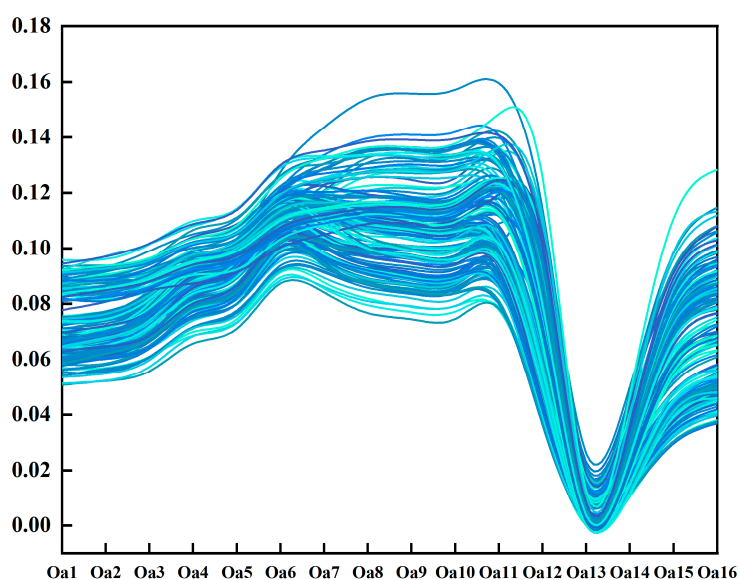

Fig S2. Sentinel 3 OLCI reflectance Rrc after atmospheric correction between Oa1-Oa16

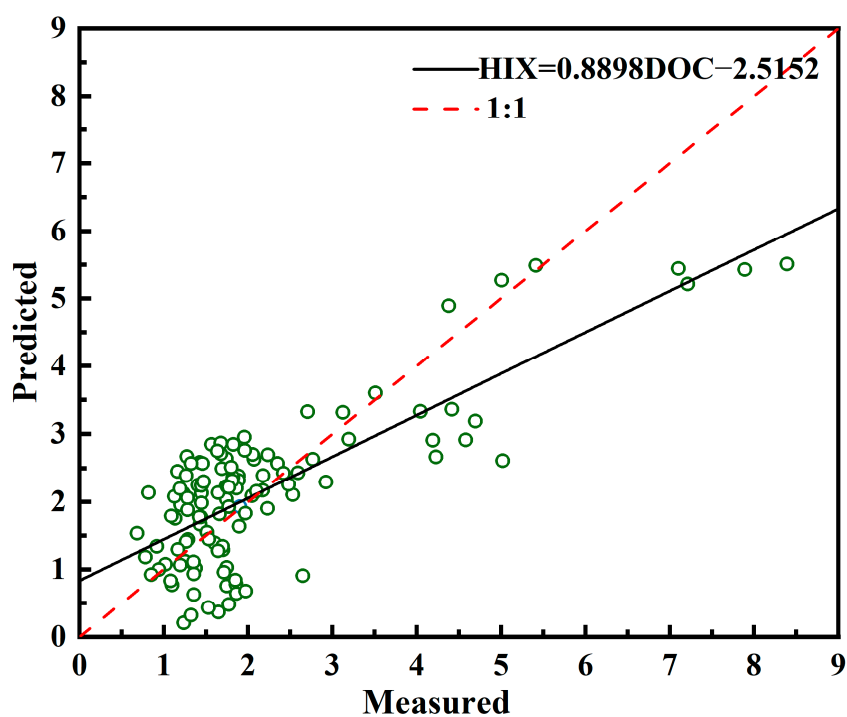

Fig S3. Accuracy Verification of HIX and CDOM Concentration Model
