# Supplementary material for: Remote Sensing Estimation of CDOM and DOC with the Environmental Implications for Lake Khanka
Source: MDPI journal article supplement (doi:10.3390/rs15245707), 2023-12-13
Supplement: s1 [file s1]

Archive with 1 entries (1 files):
- remotesensing-2722783-supplementary.pdf
